# Supplementary material
Source: PubMed Central journal article supplement (PMC2911285)
Supplement: supp_M110.105320_jbc.M110.105320-1.pdf [file supp_M110.105320_jbc.M110.105320-1.pdf]

**Supplemental data for**  
**AMINOACYL TRANSFER RATE DICTATES CHOICE OF EDITING PATHWAY IN**  
**THREONYL-tRNA SYNTHETASE**

**Anand Minajigi<sup>1</sup> and Christopher S. Francklyn<sup>1,2\*</sup>**

From the <sup>1</sup>Cell and Molecular Biology Program, <sup>2</sup>Department of Biochemistry, College of Medicine,  
Health Sciences Complex, 89 Beaumont Ave, University of Vermont, Burlington, Vermont 05405.

**Supplemental Figure 1.**

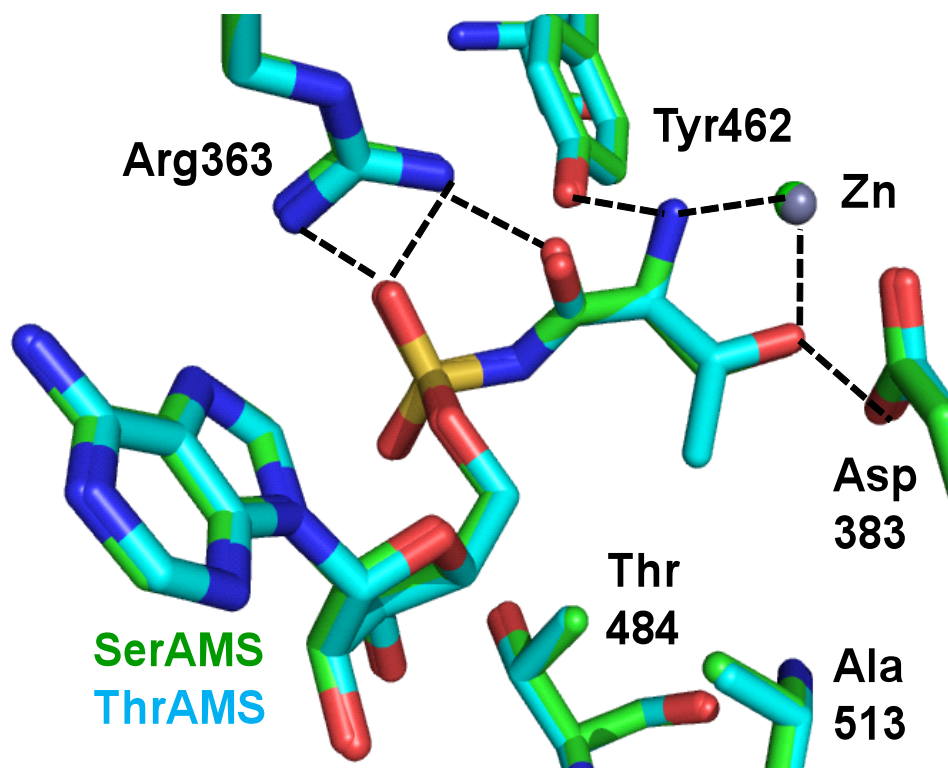

*Overlay of the ThrRS:ThrAMS and ThrRS:SerAMS active site complexes (PDB id's 1EVL and 1FYF). The cognate adenylate is shown in cyan and the seryl-adenylate is in green. Active site residues that make contact to aminoacyl moieties of adenylates are shown.*

**Supplemental Figure 2.**

**A.**

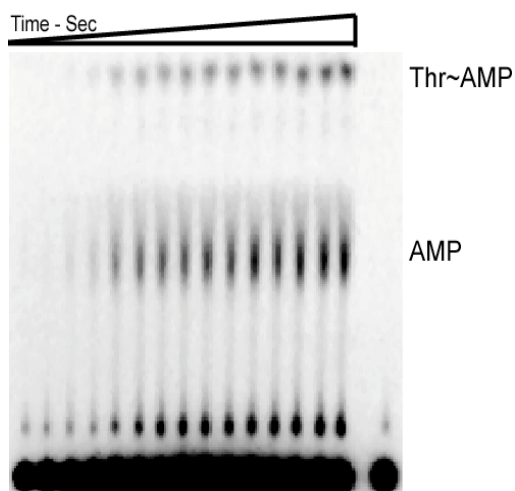

**B.**

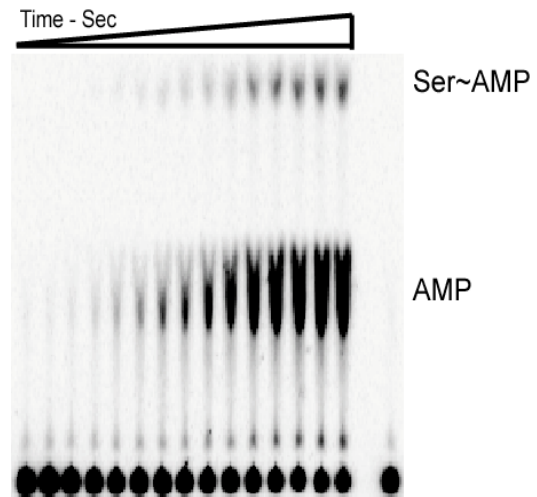

*Asymmetric amino acid activation by ThrRS.* The rapid quench experiments were performed at pH 8.0 and 37 °C in the absence of tRNA as described in Experimental Procedures, using 10  $\mu$ M ThrRS active sites, 100  $\mu$ M [ $\alpha$ - $^{32}$ P] ATP, and 5 mM threonine or 150 mM serine. (A), TLC chromatogram showing the formation of [ $\alpha$ - $^{32}$ P] AMP and Thr~[ $\alpha$ - $^{32}$ P] AMP, and (B) TLC chromatogram showing the formation of [ $\alpha$ - $^{32}$ P] AMP and Ser~[ $\alpha$ - $^{32}$ P] AMP.

**Supplemental Figure 3.**

A.

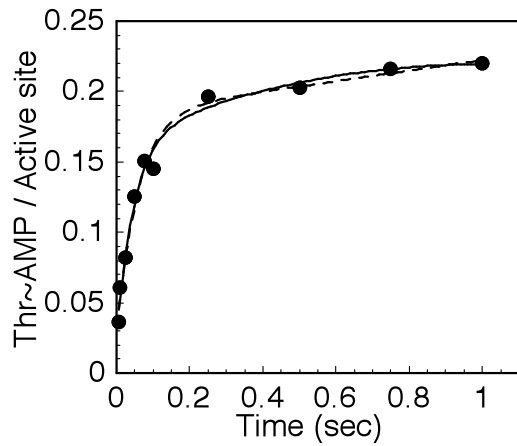

B.

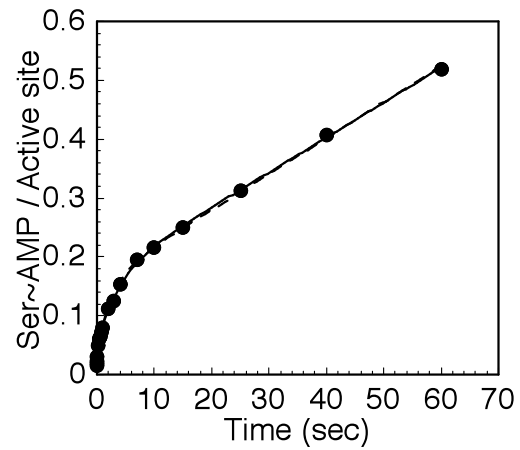

*Formation of adenylate under pre-steady state conditions:* The experimental conditions are same as described in supplemental Fig 2. The solid line represents a double exponential with a linear scale fit, while fit to a burst equation is presented as dashed line.

**Supplemental Figure 4.**

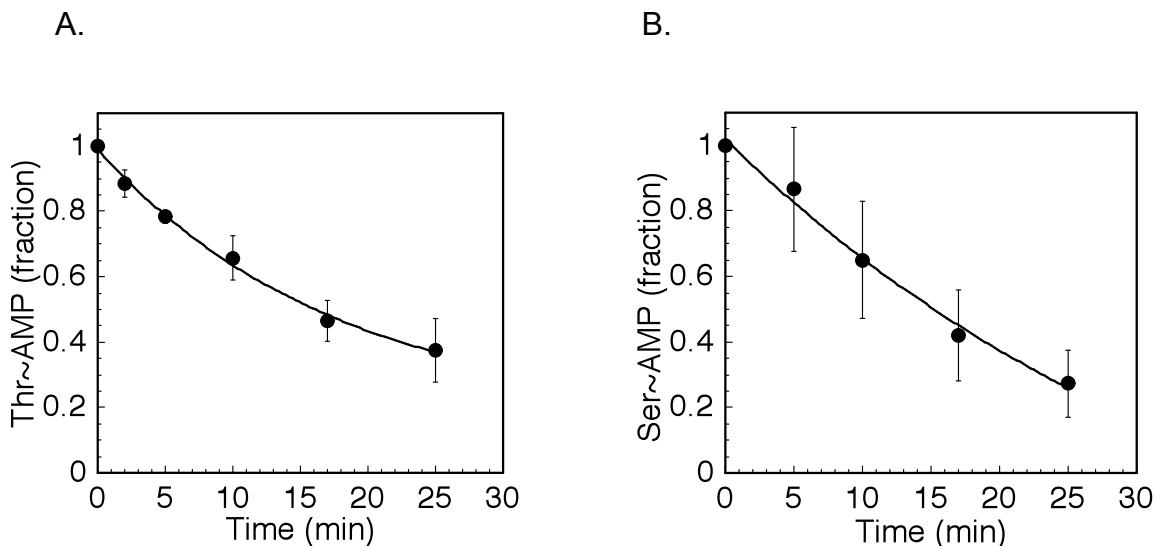

*Solvent-mediated adenylate hydrolysis is slower than the steady state rate of adenylate turnover.* (A), decay curve for threonyl-adenylate solvolysis in the absence of ThrRS. (B) decay curve for seryl-adenylate solvolysis. The adenylate formation reactions were carried out for five minutes in Buffer A at pH 8.0 and 37 °C as described in Experimental Procedures, employing 2  $\mu$ M wild type ThrRS, 100  $\mu$ M [ $\alpha$ - $^{32}$ P] ATP, and 5 mM threonine or 300 mM serine. The reaction was terminated by adding EDTA (pH 8.0) to 500 mM and SDS to 0.2% final. Hydrolysis of the adenylates was monitored by chromatography on PEI-TLC plates. The decrease in the adenylate fraction was plotted and analyzed by fitting to exponential decay equation as described in Experimental Procedures. Error bars represent mean  $\pm$  S.D from three independent experiments.
